# Supplementary material for: Molecular aggregation by hydrogen bonding in cold-crystallization behavior of mixed nucleobases analyzed by temperature-controlled infrared spectroscopy
Source: Royal Society of Chemistry journal article supplement (doi:10.1039/d3ra08293h), 2024-01-01
Supplement: d3ra08293h1.pdf [file d3ra08293h1.pdf]

## Supplementary Information

# Molecular aggregation by hydrogen bonding in cold-crystallization behavior of mixed nucleobases analyzed by temperature-controlled infrared spectroscopy

Akinori Honda,<sup>\*a,†</sup> Ryo Nozawa,<sup>a</sup> and Kazuo Miyamura<sup>\*a</sup>

\*[honda-akinori@rs.tus.ac.jp](mailto:honda-akinori@rs.tus.ac.jp) (A. Honda), [miyamura@rs.tus.ac.jp](mailto:miyamura@rs.tus.ac.jp) (K. Miyamura)

<sup>a</sup> Department of Chemistry, Faculty of Science, Tokyo University of Science, 1-3 Kagurazaka, Shinjuku-ku, Tokyo 162-8601, Japan

<sup>†</sup> Present affiliation: Department of Applied Chemistry, Faculty of Science and Engineering, Chuo University, 1-13-27 Kasuga, Bunkyo-ku, Tokyo 112-8551, Japan

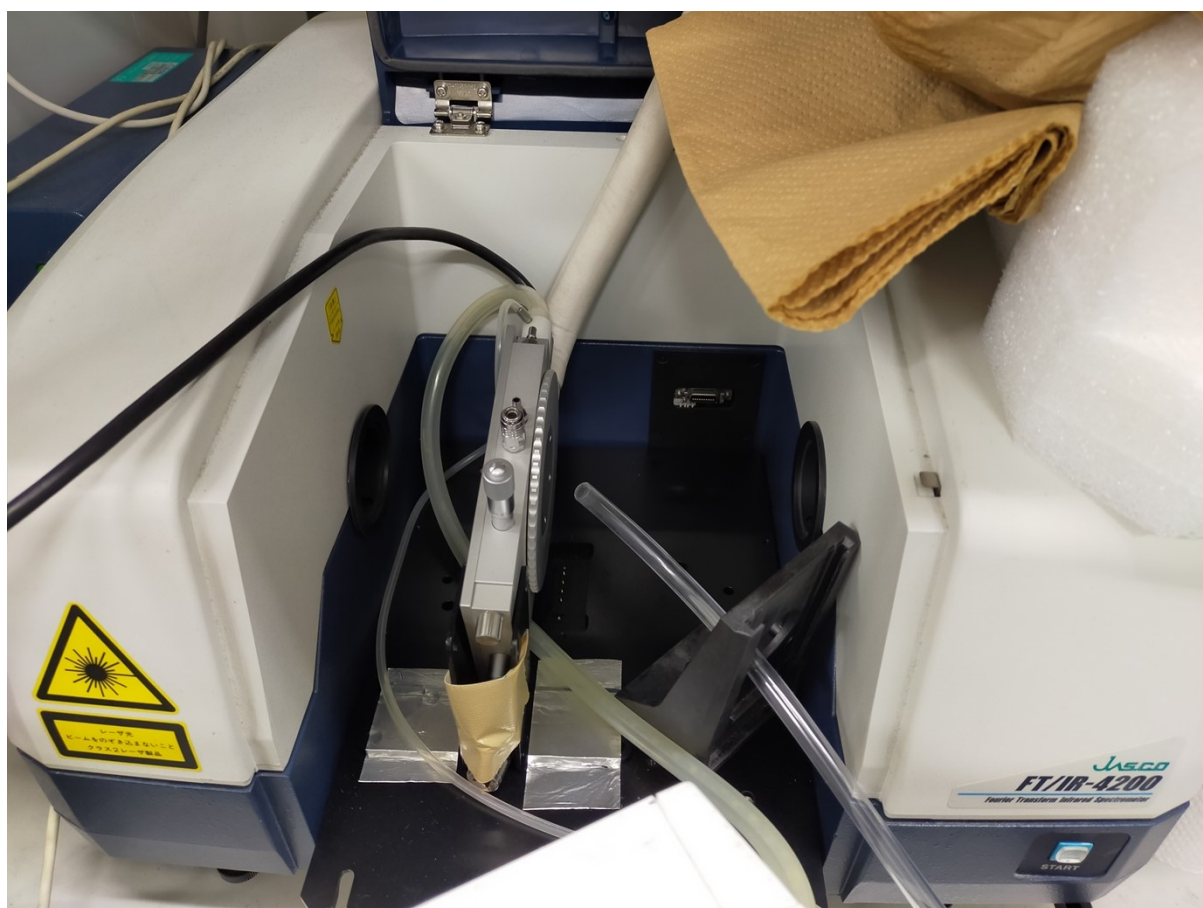

**Fig. S1** Photograph of the thermally controlled FTIR spectroscopic system.

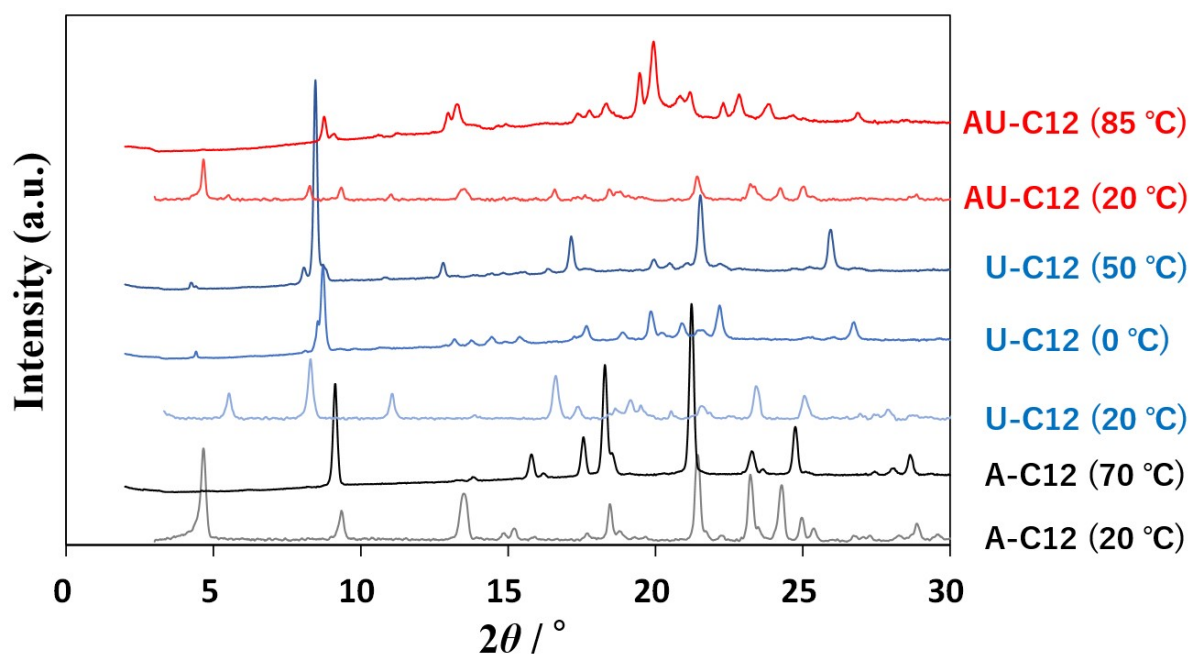

**Fig. S2** Comparison of PXRD patterns between A-C12, U-C12, and AU-C12. A-C12, U-C12, and AU-C12 (20 °C, room temperature) were the samples crystallized from solution and measured before thermal treatment. A-C12 (70 °C) was the sample crystallized in the cooling process. U-C12 (0 °C) and U-C12 (50 °C) were the samples formed by solid-solid transition in the heating and cooling processes. AU-C12 (85 °C) was the sample formed by cold crystallization in the heating process. The PXRD patterns at 20 °C were measured using a diffractometer (Ultima IV, Rigaku, Japan).

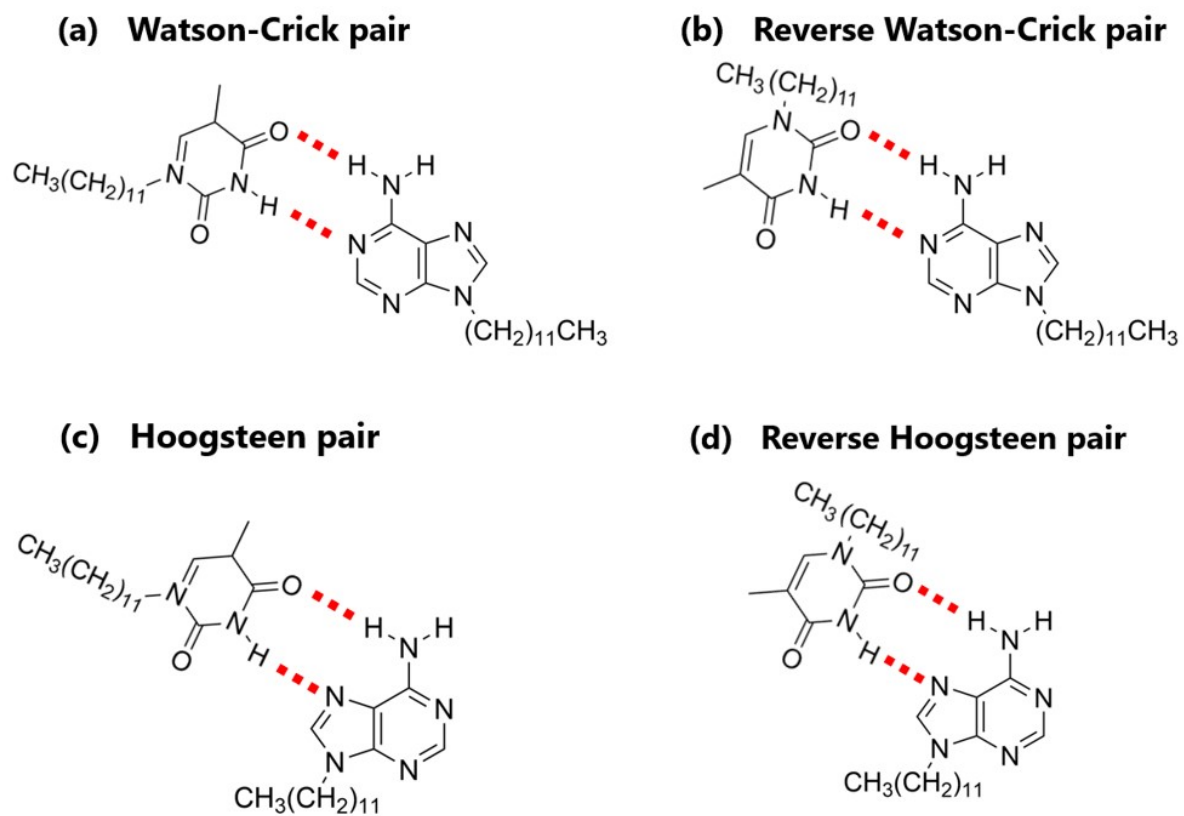

**Fig. S3** Multiple types of complementary hydrogen bonds: (a) Watson-Crick structure, (b) reverse Watson-Crick structure, (c) Hoogsteen structure, and (d) reverse Hoogsteen structure.

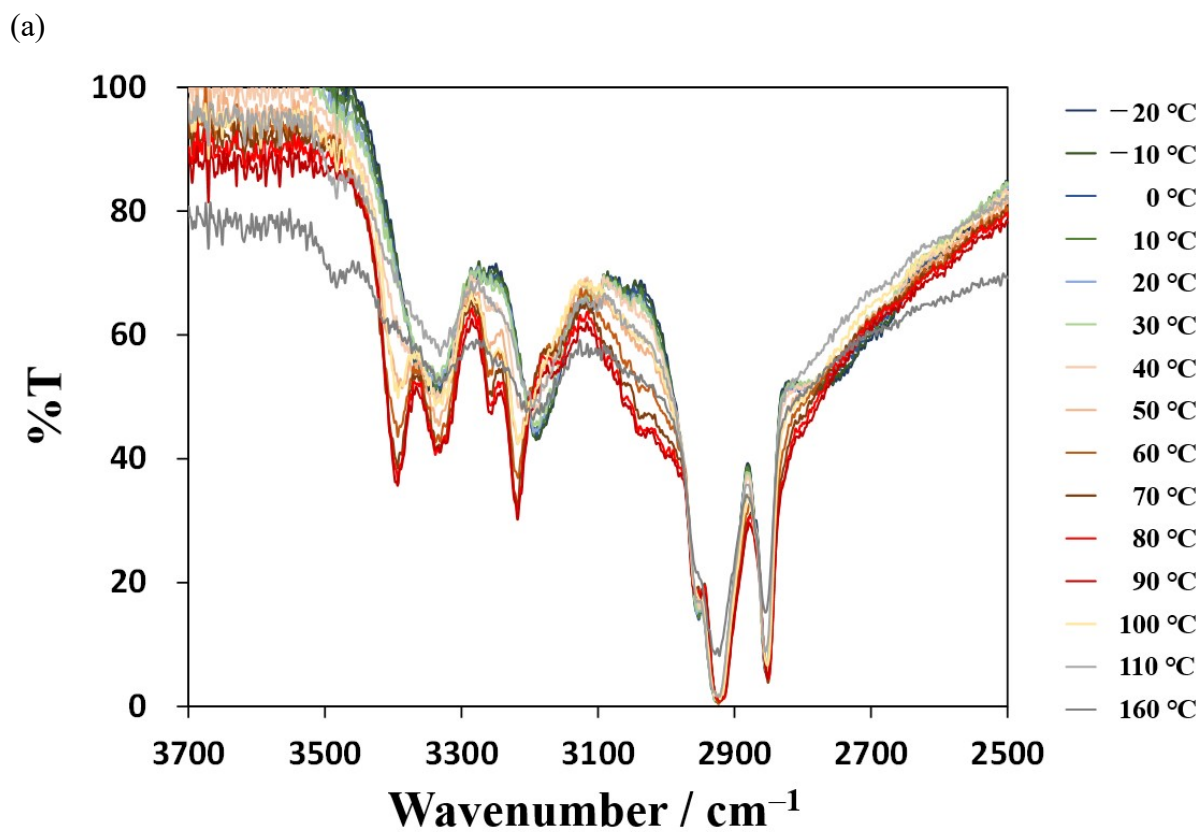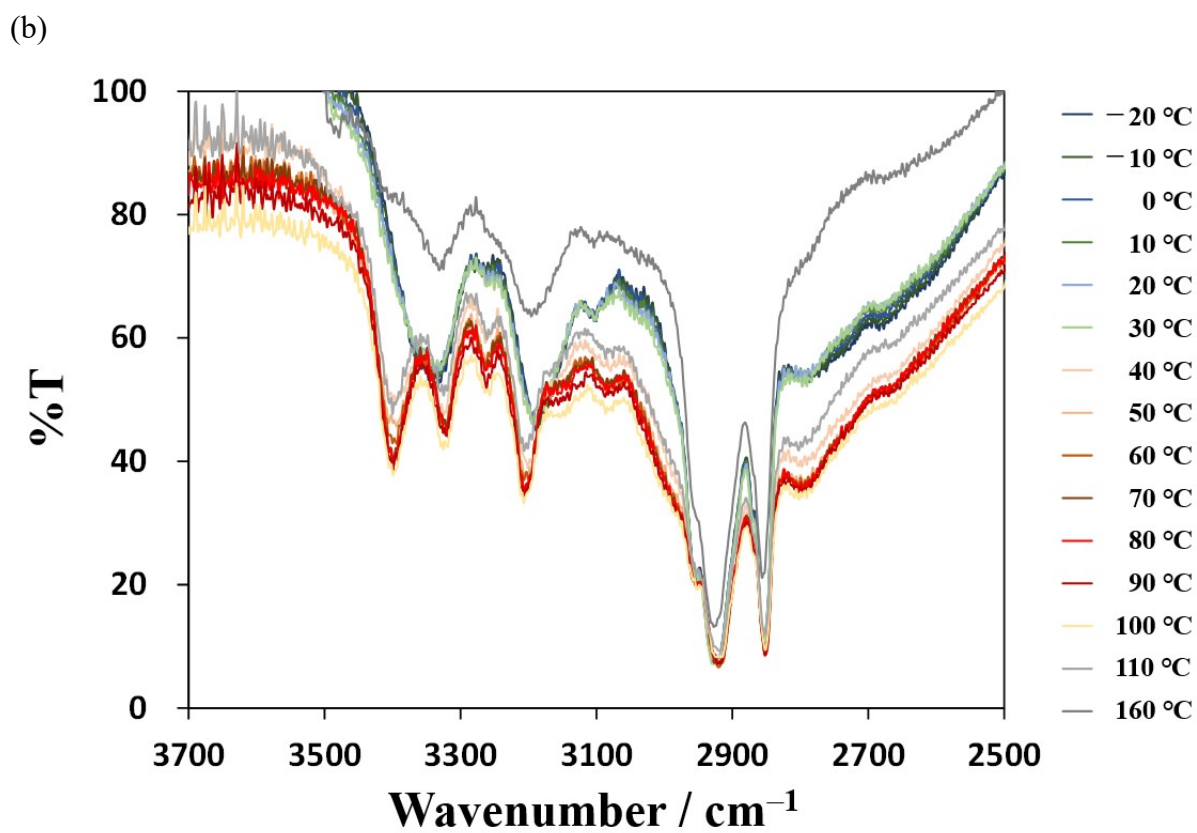

**Fig. S4** Temperature-controlled IR spectra of second heating process of (a) AT-C12 and (b) AU-C12. The spectra were measured at a step of 10 °C.
